# Supplementary material
Source: PubMed Central journal article supplement (PMC3784292)
Supplement: peds.2013-0724_peds.2013-0724SupplementaryData.pdf [file peds.2013-0724_peds.2013-0724SupplementaryData.pdf]

# 1 Supplemental Information

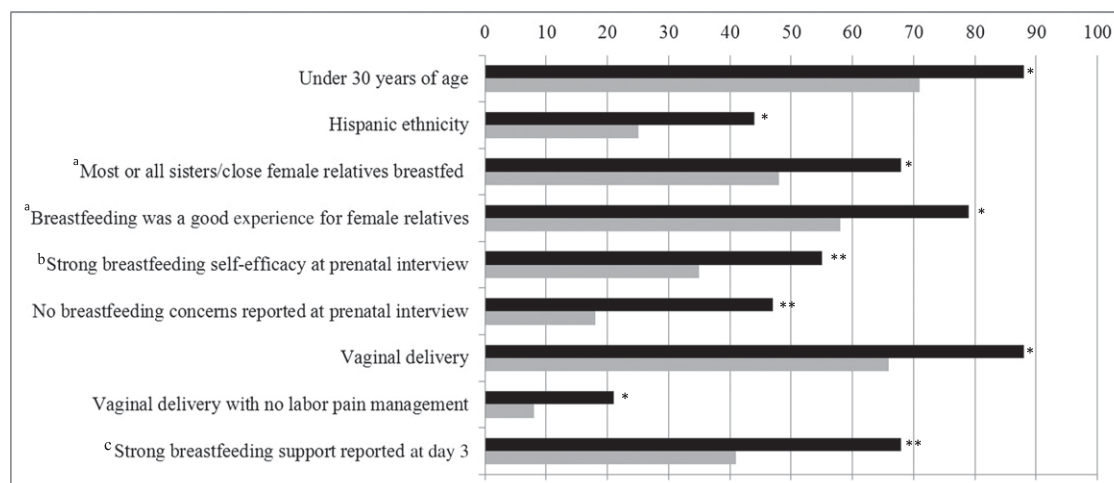

## SUPPLEMENTAL FIGURE 5

Notable characteristics (% x axis) in group who reported no breastfeeding concerns at the day 3 interview (black bars,  $n = 34$  positive deviants) versus group who reported  $\geq 1$  breastfeeding concern (gray bars,  $n = 368$ ). Maternal education level, health insurance status, Supplemental Nutrition Program for Women, Infants, and Children participation, BMI, and infant feeding intentions did not differ significantly between the 2 groups;  $*P < .05$  and  $**P < .01$ . <sup>a</sup> Assessed at prenatal interview (question in quotes with list of possible responses in brackets), "Did any of your sisters or close female relatives ever breastfeed their children?" [Yes, most or all did; some did and some did not; most or all did not; don't know] and "Of those who breastfed, was breastfeeding a good experience for them?" [Yes, no, mixed, don't know]. Similar questions were asked about the participant's mother and close friends, but there were no significant differences in responses to these questions between the positive deviants and the other participants. <sup>b</sup>Breastfeeding Self-Efficacy Scale, short-form (Dennis 2003)<sup>12</sup> mean score  $> 3.5$ . <sup>c</sup>Maximum score on composite of 3 measures (reported support from family and friends for breastfeeding + convenience of breastfeeding compared with bottle feeding + no embarrassment to breastfeed).

**SUPPLEMENTAL TABLE 4** Prevalence of Maternally Reported Breastfeeding Concerns by Selected Interview Time Points, Stratified by Maternal Socio-demographic Variables

| Category                         | Any Concern <sup>a</sup> |          |          | Infant Feeding Difficulty |          |          | Milk Quantity Concern |          |         | Uncertainty With Own Breastfeeding Ability |         |         | Breastfeeding Pain |          |          | Signs of Insufficient Intake <sup>b</sup> |         |         | Comments                                                                                                                                                                                                                                                                                  |
|----------------------------------|--------------------------|----------|----------|---------------------------|----------|----------|-----------------------|----------|---------|--------------------------------------------|---------|---------|--------------------|----------|----------|-------------------------------------------|---------|---------|-------------------------------------------------------------------------------------------------------------------------------------------------------------------------------------------------------------------------------------------------------------------------------------------|
|                                  | PN                       | Day 3    | Day 7    | PN                        | Day 3    | Day 7    | PN                    | Day 3    | Day 7   | PN                                         | Day 3   | Day 7   | PN                 | Day 3    | Day 7    | PN                                        | Day 3   | Day 7   |                                                                                                                                                                                                                                                                                           |
|                                  |                          |          |          |                           |          |          |                       |          |         |                                            |         |         |                    |          |          |                                           |         |         |                                                                                                                                                                                                                                                                                           |
| Ethnicity                        | No. (%)                  | No. (%)  | No. (%)  | No. (%)                   | No. (%)  | No. (%)  | No. (%)               | No. (%)  | No. (%) | No. (%)                                    | No. (%) | No. (%) | No. (%)            | No. (%)  | No. (%)  | No. (%)                                   | No. (%) | No. (%) | Wide differences in prevalence of prenatal breastfeeding concerns by ethnicity. For example, Hispanic women whose primary language was Spanish had the lowest prevalence of any prenatal breastfeeding concern, but differences by ethnicity largely disappeared in postnatal interviews. |
| Asian                            | 52 (81)                  | 51 (94)  | 43 (90)  | 17 (27)                   | 26 (48)  | 23 (48)  | 28 (44)               | 28 (52)  | 17 (35) | 19 (30)                                    | 18 (33) | 12 (25) | 16 (25)            | 26 (48)  | 20 (42)  | 8 (15)                                    | 11 (23) |         |                                                                                                                                                                                                                                                                                           |
| African-American                 | 58 (77)                  | 58 (95)  | 44 (79)  | 24 (32)                   | 34 (66)  | 24 (43)  | 10 (13)               | 26 (43)  | 9 (16)  | 21 (28)                                    | 18 (30) | 11 (20) | 28 (37)            | 33 (54)  | 33 (59)  | 3 (5)                                     | 4 (7)   |         |                                                                                                                                                                                                                                                                                           |
| White, non-Hispanic              | 184 (84)                 | 159 (92) | 137 (83) | 90 (41)                   | 86 (50)  | 70 (42)  | 71 (35)               | 70 (41)  | 48 (29) | 77 (35)                                    | 53 (31) | 43 (26) | 70 (32)            | 68 (40)  | 72 (43)  | 31 (18)                                   | 31 (19) |         |                                                                                                                                                                                                                                                                                           |
| Hispanic (English-speaking)      | 59 (74)                  | 55 (87)  | 49 (83)  | 23 (29)                   | 33 (52)  | 31 (53)  | 18 (25)               | 18 (29)  | 13 (22) | 20 (25)                                    | 19 (30) | 16 (27) | 23 (29)            | 25 (40)  | 27 (46)  | 7 (11)                                    | 9 (15)  |         |                                                                                                                                                                                                                                                                                           |
| Hispanic (Spanish-speaking)      | 38 (61)                  | 45 (85)  | 43 (81)  | 7 (11)                    | 28 (53)  | 20 (38)  | 21 (34)               | 24 (45)  | 15 (28) | 10 (16)                                    | 8 (15)  | 10 (19) | 15 (24)            | 22 (42)  | 23 (43)  | 3 (6)                                     | 3 (6)   |         |                                                                                                                                                                                                                                                                                           |
| Identifies major ethnic category | 27 (82)                  | 26 (100) | 22 (92)  | 10 (50)                   | 18 (69)  | 13 (54)  | 12 (36)               | 8 (31)   | 5 (21)  | 15 (46)                                    | 6 (23)  | 3 (13)  | 9 (27)             | 14 (54)  | 15 (63)  | 5 (19)                                    | 6 (25)  |         |                                                                                                                                                                                                                                                                                           |
| <i>P</i>                         | .004                     | .11      | .59      | .0005                     | .55      | .54      | .002                  | .6       | .24     | .02                                        | .28     | .59     | .51                | .31      | .2       | .053                                      | .04     |         |                                                                                                                                                                                                                                                                                           |
| Age, y                           |                          |          |          |                           |          |          |                       |          |         |                                            |         |         |                    |          |          |                                           |         |         | Although there was no clear pattern of differences in prevalence of prenatal breastfeeding concern, but differences by ethnicity largely disappeared in postnatal interviews.                                                                                                             |
| <25                              | 188 (73)                 | 184 (89) | 146 (78) | 110 (53)                  | 80 (43)  | 80 (43)  | 60 (23)               | 74 (36)  | 40 (21) | 70 (27)                                    | 43 (21) | 32 (17) | 69 (27)            | 98 (48)  | 92 (49)  | 13 (6)                                    | 15 (8)  |         |                                                                                                                                                                                                                                                                                           |
| 25–29.9                          | 106 (82)                 | 99 (92)  | 88 (85)  | 82 (63)                   | 62 (57)  | 52 (50)  | 49 (38)               | 43 (40)  | 22 (21) | 40 (31)                                    | 32 (30) | 22 (21) | 34 (26)            | 44 (41)  | 48 (47)  | 17 (16)                                   | 16 (16) |         |                                                                                                                                                                                                                                                                                           |
| >30                              | 124 (86)                 | 111 (97) | 104 (90) | 88 (61)                   | 62 (46)  | 49 (43)  | 51 (35)               | 57 (50)  | 45 (39) | 52 (36)                                    | 47 (39) | 41 (36) | 58 (40)            | 46 (40)  | 50 (43)  | 27 (23)                                   | 33 (29) |         |                                                                                                                                                                                                                                                                                           |
| <i>P</i>                         | .005                     | .08      | .01      | .23                       | .38      | .38      | .004                  | .057     | .001    | .17                                        | .0007   | .0009   | .009               | .32      | .65      | <.0001                                    | <.0001  |         |                                                                                                                                                                                                                                                                                           |
| Health insurance status          |                          |          |          |                           |          |          |                       |          |         |                                            |         |         |                    |          |          |                                           |         |         | concerns by maternal age, older mothers reported milk quantity concern, uncertainty with own breastfeeding ability, and signs of insufficient intake more often than younger mothers at the day 3 and day 7 interviews. Patterns of distribution were similar for                         |
| Private                          | 225 (84)                 | 204 (94) | 179 (87) | 107 (40)                  | 109 (50) | 99 (48)  | 96 (36)               | 98 (45)  | 68 (33) | 86 (16)                                    | 70 (32) | 58 (28) | 96 (36)            | 90 (41)  | 90 (44)  | 40 (18)                                   | 45 (22) |         |                                                                                                                                                                                                                                                                                           |
| Public                           | 191 (73)                 | 187 (90) | 156 (79) | 63 (24)                   | 113 (54) | 81 (41)  | 63 (24)               | 74 (36)  | 37 (19) | 74 (28)                                    | 51 (25) | 37 (19) | 65 (25)            | 97 (47)  | 97 (49)  | 16 (7)                                    | 17 (9)  |         |                                                                                                                                                                                                                                                                                           |
| <i>P</i>                         | .001                     | .22      | .03      | <.0001                    | .34      | .15      | .003                  | .053     | .001    | .33                                        | .09     | .02     | .006               | .25      | .28      | .001                                      | .0002   |         |                                                                                                                                                                                                                                                                                           |
| Education level                  |                          |          |          |                           |          |          |                       |          |         |                                            |         |         |                    |          |          |                                           |         |         |                                                                                                                                                                                                                                                                                           |
| High school or less              | 153 (72)                 | 154 (89) | 125 (78) | 58 (27)                   | 92 (53)  | 66 (41)  | 50 (23)               | 66 (38)  | 33 (21) | 56 (26)                                    | 38 (22) | 29 (18) | 60 (28)            | 83 (48)  | 81 (50)  | 7 (4)                                     | 9 (6)   |         |                                                                                                                                                                                                                                                                                           |
| At least some college            | 265 (83)                 | 240 (93) | 213 (87) | 113 (36)                  | 133 (52) | 115 (47) | 110 (35)              | 108 (42) | 74 (30) | 106 (33)                                   | 84 (33) | 66 (27) | 101 (32)           | 105 (41) | 109 (45) | 50 (20)                                   | 55 (14) |         |                                                                                                                                                                                                                                                                                           |
| <i>P</i>                         | .001                     | .08      | .014     | .04                       | .8       | .24      | .006                  | .4       | .03     | .08                                        | .01     | .04     | .36                | .15      | .25      | <.0001                                    | <.0001  |         |                                                                                                                                                                                                                                                                                           |

**SUPPLEMENTAL TABLE 4** Continued

| Category                  | Any Concern <sup>a</sup> |          | Infant Feeding Difficulty |         | Milk Quantity Concern |          | Uncertainty With Own Breastfeeding Ability |          | Breastfeeding Pain |         | Signs of Insufficient Intake <sup>b</sup> |         | Comments |          |          |         |         |                                                                                                                                                                                                                                                                                                                                                                                                                                                                                   |
|---------------------------|--------------------------|----------|---------------------------|---------|-----------------------|----------|--------------------------------------------|----------|--------------------|---------|-------------------------------------------|---------|----------|----------|----------|---------|---------|-----------------------------------------------------------------------------------------------------------------------------------------------------------------------------------------------------------------------------------------------------------------------------------------------------------------------------------------------------------------------------------------------------------------------------------------------------------------------------------|
|                           | PN                       | Day 3    | Day 7                     | PN      | Day 3                 | Day 7    | PN                                         | Day 3    | Day 7              | PN      | Day 3                                     | Day 7   |          |          |          |         |         |                                                                                                                                                                                                                                                                                                                                                                                                                                                                                   |
|                           |                          |          |                           |         |                       |          |                                            |          |                    |         |                                           |         |          |          |          |         |         |                                                                                                                                                                                                                                                                                                                                                                                                                                                                                   |
| Delivery mode             |                          |          |                           |         |                       |          |                                            |          |                    |         |                                           |         |          |          |          |         |         |                                                                                                                                                                                                                                                                                                                                                                                                                                                                                   |
| Vaginal                   | 246 (77)                 | 262 (89) | 217 (79)                  | 95 (30) | 144 (49)              | 113 (41) | 94 (30)                                    | 117 (40) | 66 (24)            | 93 (29) | 72 (25)                                   | 51 (19) | 96 (30)  | 128 (44) | 132 (48) | 37 (13) | 35 (13) | Women who went on to have a cesarean delivery reported similar prevalence of prenatal breastfeeding concerns as those who had a vaginal delivery. However, in the first week postpartum, women who delivered via cesarean delivery were significantly more likely to report any breastfeeding concern and specifically report infant feeding difficulty, uncertainty with own breastfeeding ability, and signs of insufficient intake, compared with women with vaginal delivery. |
| Cesarean                  | 111 (80)                 | 130 (97) | 120 (93)                  | 53 (38) | 80 (60)               | 68 (53)  | 47 (34)                                    | 56 (42)  | 41 (32)            | 42 (30) | 50 (37)                                   | 44 (34) | 33 (24)  | 59 (44)  | 57 (44)  | 20 (15) | 28 (22) |                                                                                                                                                                                                                                                                                                                                                                                                                                                                                   |
| <i>P</i>                  | .55                      | .008     | .0004                     | .08     | .04                   | .03      | .37                                        | .72      | .1                 | .83     | .007                                      | .0006   | .16      | .95      | .47      | .52     | .02     |                                                                                                                                                                                                                                                                                                                                                                                                                                                                                   |
| Maternal BMI <sup>c</sup> |                          |          |                           |         |                       |          |                                            |          |                    |         |                                           |         |          |          |          |         |         |                                                                                                                                                                                                                                                                                                                                                                                                                                                                                   |
| < =-30                    | 220 (80)                 | 253 (93) | 223 (83)                  | 89 (32) | 142 (52)              | 116 (43) | 89 (22)                                    | 109 (40) | 70 (26)            | 90 (33) | 77 (28)                                   | 63 (23) | 87 (32)  | 129 (47) | 135 (50) | 38 (14) | 42 (16) | There were no significant differences between obese and nonobese participants in prevalence of prenatal or postnatal breastfeeding concerns.                                                                                                                                                                                                                                                                                                                                      |
| >30                       | 98 (75)                  | 116 (90) | 109 (85)                  | 46 (35) | 66 (51)               | 61 (48)  | 38 (29)                                    | 52 (40)  | 35 (27)            | 31 (24) | 37 (29)                                   | 30 (23) | 31 (24)  | 48 (37)  | 53 (41)  | 19 (15) | 22 (17) |                                                                                                                                                                                                                                                                                                                                                                                                                                                                                   |
| <i>P</i>                  | .29                      | .35      | .52                       | .55     | .87                   | .38      | .53                                        | .94      | .76                | .07     | .92                                       | .98     | .11      | .056     | .11      | .83     | .68     |                                                                                                                                                                                                                                                                                                                                                                                                                                                                                   |

**SUPPLEMENTAL TABLE 4** Continued

| Category                                   | Any Concern <sup>a</sup> |          | Infant Feeding Difficulty |         | Milk Quantity Concern |         | Uncertainty With Own Breastfeeding Ability |         | Breastfeeding Pain |         | Signs of Insufficient Intake <sup>b</sup> |         | Comments |         |         |         |                                                                                                                                                                                                                                                                                                                                                                                                                          |
|--------------------------------------------|--------------------------|----------|---------------------------|---------|-----------------------|---------|--------------------------------------------|---------|--------------------|---------|-------------------------------------------|---------|----------|---------|---------|---------|--------------------------------------------------------------------------------------------------------------------------------------------------------------------------------------------------------------------------------------------------------------------------------------------------------------------------------------------------------------------------------------------------------------------------|
|                                            | PN                       | Day 3    | Day 7                     | PN      | Day 3                 | Day 7   | PN                                         | Day 3   | Day 7              | PN      | Day 3                                     | Day 7   |          |         |         |         |                                                                                                                                                                                                                                                                                                                                                                                                                          |
| Feeding intentions <sup>d,e</sup>          |                          |          |                           |         |                       |         |                                            |         |                    |         |                                           |         |          |         |         |         |                                                                                                                                                                                                                                                                                                                                                                                                                          |
| Weak/moderate                              | 114 (80)                 | 99 (93)  | 82 (82)                   | 37 (26) | 58 (55)               | 41 (41) | 28 (20)                                    | 43 (41) | 25 (25)            | 55 (59) | 27 (25)                                   | 24 (24) | 53 (37)  | 54 (51) | 9 (8)   | 13 (13) | Prenatally, those with weak/moderate breastfeeding intentions were less likely to report milk quantity concern and more likely to express concerns about uncertainty with own breastfeeding ability and pain while breastfeeding, compared with those with stronger breastfeeding intentions, but there were no significant differences in prevalence of postnatal breastfeeding concerns by feeding intention category. |
| Strong                                     | 135 (80)                 | 123 (90) | 103 (82)                  | 62 (37) | 75 (55)               | 59 (47) | 54 (32)                                    | 60 (44) | 32 (25)            | 51 (30) | 31 (23)                                   | 23 (18) | 54 (32)  | 54 (40) | 23 (17) | 23 (18) |                                                                                                                                                                                                                                                                                                                                                                                                                          |
| Very strong                                | 169 (76)                 | 172 (92) | 153 (85)                  | 72 (32) | 92 (49)               | 81 (45) | 78 (35)                                    | 71 (38) | 50 (27)            | 56 (25) | 64 (34)                                   | 48 (27) | 54 (24)  | 80 (43) | 25 (13) | 28 (16) |                                                                                                                                                                                                                                                                                                                                                                                                                          |
| <i>P</i>                                   | .51                      | .76      | .71                       | .12     | .49                   | .67     | .006                                       | .54     | .84                | .02     | .06                                       | .23     | .03      | .2      | .16     | .56     |                                                                                                                                                                                                                                                                                                                                                                                                                          |
| Breastfeeding self-efficacy <sup>e,f</sup> |                          |          |                           |         |                       |         |                                            |         |                    |         |                                           |         |          |         |         |         |                                                                                                                                                                                                                                                                                                                                                                                                                          |
| Low (<3)                                   | 149 (85)                 | 130(88)  | 114 (90)                  | 62 (35) | 74 (56)               | 60(48)  | 47 (27)                                    | 66 (50) | 41 (33)            | 76 (43) | 50 (38)                                   | 40 (32) | 74 (42)  | 70 (53) | 15 (11) | 19 (15) | Participants with strong (as opposed to moderate or low) breastfeeding self-efficacy were generally less likely to report breastfeeding concerns both prenatally and postnatally. Notable exceptions for which there were no significant differences were concern about infant feeding                                                                                                                                   |
| Moderate (3–3.49)                          | 151 (87)                 | 128 (91) | 109(83)                   | 70 (40) | 74 (52)               | 59 (45) | 58 (33)                                    | 54 (38) | 38 (29)            | 57 (33) | 40 (28)                                   | 27 (20) | 55 (32)  | 53 (38) | 23 (16) | 25 (19) |                                                                                                                                                                                                                                                                                                                                                                                                                          |
| Strong (≥3.5)                              | 118 (64)                 | 136(88)  | 115 (78)                  | 39 (21) | 77 (50)               | 62 (42) | 55 (30)                                    | 54 (35) | 28 (19)            | 29 (16) | 32 (21)                                   | 28 (19) | 32 (17)  | 66 (45) | 19 (12) | 20 (14) |                                                                                                                                                                                                                                                                                                                                                                                                                          |
| <i>P</i>                                   | <.0001                   | .007     | .02                       | .0003   | .6                    | .64     | .42                                        | .03     | .03                | <.0001  | .006                                      | .03     | <.0001   | .04     | .42     | .45     |                                                                                                                                                                                                                                                                                                                                                                                                                          |

**SUPPLEMENTAL TABLE 4** Continued

| Category                                          | Any Concern <sup>a</sup> |          | Infant Feeding Difficulty |          | Milk Quantity Concern |          | Uncertainty With Own Breastfeeding Ability |          | Breastfeeding Pain |         | Signs of Insufficient Intake <sup>b</sup> |         | Comments                                                                                                                                                                                                                                                                                                                        |         |          |          |         |         |
|---------------------------------------------------|--------------------------|----------|---------------------------|----------|-----------------------|----------|--------------------------------------------|----------|--------------------|---------|-------------------------------------------|---------|---------------------------------------------------------------------------------------------------------------------------------------------------------------------------------------------------------------------------------------------------------------------------------------------------------------------------------|---------|----------|----------|---------|---------|
|                                                   | PN                       | Day 3    | Day 7                     | PN       | Day 3                 | Day 7    | PN                                         | Day 3    | Day 7              | PN      | Day 3                                     | Day 7   |                                                                                                                                                                                                                                                                                                                                 |         |          |          |         |         |
| Comfort with idea of breastfeeding <sup>e,s</sup> |                          |          |                           |          |                       |          |                                            |          |                    |         |                                           |         | difficulty or signs of insufficient intake at day 3 or day 7.<br><br>Although there were significant differences in prenatal prevalence of uncertainty with own breastfeeding ability and breastfeeding pain by comfort with the idea of breastfeeding, differences in concerns postnatally were not statistically significant. |         |          |          |         |         |
| Somewhat/very uncomfortable                       | 56 (82)                  | 45 (94)  | 34 (85)                   | 15 (22)  | 26 (54)               | 17 (43)  | 18 (27)                                    | 18 (38)  | 12 (30)            | 31 (46) | 13 (27)                                   | 10 (25) |                                                                                                                                                                                                                                                                                                                                 | 33 (49) | 24 (50)  | 19 (48)  | 3 (6)   | 3 (8)   |
| Somewhat comfortable                              | 119 (86)                 | 107 (96) | 98 (89)                   | 50 (36)  | 65 (58)               | 55 (50)  | 48 (35)                                    | 54 (48)  | 38 (35)            | 53 (38) | 36 (32)                                   | 28 (26) |                                                                                                                                                                                                                                                                                                                                 | 54 (39) | 56 (50)  | 62 (56)  | 18 (16) | 24 (22) |
| Very comfortable                                  | 242 (75)                 | 241 (90) | 205 (80)                  | 106 (33) | 133 (50)              | 109 (43) | 94 (29)                                    | 102 (38) | 57 (22)            | 77 (24) | 73 (27)                                   | 56 (22) |                                                                                                                                                                                                                                                                                                                                 | 74 (23) | 107 (40) | 108 (42) | 36 (13) | 37 (15) |
| <i>P</i>                                          | .02                      | .17      | .12                       | .13      | .31                   | .42      | .39                                        | .17      | .05                | <.0001  | .61                                       | .74     |                                                                                                                                                                                                                                                                                                                                 | <.0001  | .13      | .05      | .25     | .07     |
| Comfort with the idea of Formula <sup>e,s</sup>   |                          |          |                           |          |                       |          |                                            |          |                    |         |                                           |         | In general, prevalence of breastfeeding concerns was similar across levels of comfort with the idea of feeding formula. There appear to be differences in report of infant feeding difficulty by level of comfort with the idea of formula, but a clear pattern does not emerge.                                                |         |          |          |         |         |
| Very uncomfortable                                | 61 (74)                  | 64 (88)  | 56 (81)                   | 26 (31)  | 25 (34)               | 23 (33)  | 24 (29)                                    | 29 (40)  | 17 (25)            | 21 (25) | 23 (32)                                   | 17 (25) |                                                                                                                                                                                                                                                                                                                                 | 20 (24) | 32 (44)  | 34 (49)  | 8 (11)  | 9 (13)  |
| Somewhat uncomfortable                            | 137 (81)                 | 125 (91) | 113 (84)                  | 64 (38)  | 75 (55)               | 63 (47)  | 59 (35)                                    | 53 (39)  | 33 (25)            | 47 (28) | 40 (29)                                   | 32 (24) |                                                                                                                                                                                                                                                                                                                                 | 47 (28) | 58 (42)  | 60 (45)  | 23 (17) | 25 (19) |
| Somewhat comfortable                              | 155 (82)                 | 149 (94) | 124 (84)                  | 64 (34)  | 90 (57)               | 72 (49)  | 58 (31)                                    | 70 (44)  | 41 (28)            | 60 (32) | 48 (30)                                   | 35 (24) |                                                                                                                                                                                                                                                                                                                                 | 68 (36) | 67 (42)  | 64 (43)  | 22 (14) | 27 (18) |
| <i>P</i>                                          | .11                      | .44      | .93                       | .02      | .008                  | .17      | .13                                        | .71      | .88                | .28     | .3                                        | .93     |                                                                                                                                                                                                                                                                                                                                 | .17     | .61      | .26      | .25     | .1      |
| Breastfeeding support <sup>h</sup>                |                          |          |                           |          |                       |          |                                            |          |                    |         |                                           |         | Participants who reported the most breastfeeding social support had the lowest prevalence of any breastfeeding concern at the prenatal, day 3, and                                                                                                                                                                              |         |          |          |         |         |
| Least                                             | 131 (86)                 | 148 (97) | 127 (90)                  | 56 (37)  | 92 (61)               | 78 (55)  | 42 (27)                                    | 77 (51)  | 55 (39)            | 61 (40) | 49 (33)                                   | 37 (26) |                                                                                                                                                                                                                                                                                                                                 | 58 (38) | 58 (39)  | 59 (42)  | 27 (18) | 29 (21) |
| Moderate                                          | 76 (78)                  | 90 (93)  | 76 (83)                   | 30 (31)  | 60 (62)               | 47 (51)  | 36 (37)                                    | 31 (32)  | 14 (15)            | 31 (32) | 28 (29)                                   | 25 (27) |                                                                                                                                                                                                                                                                                                                                 | 30 (31) | 49 (50)  | 47 (51)  | 12 (21) | 10 (11) |
| Most                                              | 129 (72)                 | 155 (87) | 135 (78)                  | 55 (31)  | 70 (39)               | 56 (32)  | 54 (30)                                    | 64 (36)  | 38 (22)            | 37 (21) | 44 (24)                                   | 33 (19) |                                                                                                                                                                                                                                                                                                                                 | 37 (21) | 80 (45)  | 84 (49)  | 18 (10) | 25 (14) |
| <i>P</i>                                          | .009                     | .002     | .02                       | .46      | <.0001                | <.0001   | .26                                        | .003     | <.0001             | .0006   | .27                                       | .2      |                                                                                                                                                                                                                                                                                                                                 | .002    | .18      | .32      | .1      | .11     |

**SUPPLEMENTAL TABLE 4** Continued

| Category | Any Concern <sup>a</sup> |       | Infant Feeding Difficulty |       | Milk Quantity Concern |    | Uncertainty With Own Breastfeeding Ability |       | Breastfeeding Pain |       | Signs of Insufficient Intake <sup>b</sup> |       | Comments                                                                                                                                                                                                                                                                                                                                                                                       |
|----------|--------------------------|-------|---------------------------|-------|-----------------------|----|--------------------------------------------|-------|--------------------|-------|-------------------------------------------|-------|------------------------------------------------------------------------------------------------------------------------------------------------------------------------------------------------------------------------------------------------------------------------------------------------------------------------------------------------------------------------------------------------|
|          | Day 3                    | Day 7 | PN                        | Day 3 | Day 7                 | PN | Day 3                                      | Day 7 | PN                 | Day 3 | Day 7                                     | Day 3 |                                                                                                                                                                                                                                                                                                                                                                                                |
|          | PN                       |       |                           |       |                       |    |                                            |       |                    |       |                                           |       | day 7 interviews, whereas women who reported the least social support had the highest prevalence of concerns about infant feeding difficulty or milk quantity at day 3 and day 7. However, there were no significant differences by breastfeeding social support category in prevalence of concerns about breastfeeding pain or uncertainty with own breastfeeding ability at day 3 and day 7. |

<sup>a</sup> Presented as the number (percent) within each group reporting the problem or concern (*N* = 532, prenatal interview; *N* = 429, day 3 interview; *N* = 406, day 7 interview).

<sup>b</sup> Concern about medical sign of insufficient intake reported by only 2 individuals at prenatal interview, data not shown.

<sup>c</sup> BMI (kg/m<sup>2</sup>) assessed at the day 7 interview.

<sup>d</sup> Infant Feeding Intentions Scale (range: 0–16): weak/moderate, <11.5; strong, 12–15.5; or very strong, 16.

<sup>e</sup> Assessed at the prenatal interview.

<sup>f</sup> Breastfeeding Self-Efficacy Scale, short-form (Dennis 2003).<sup>12</sup>

<sup>g</sup> For the questions “How do you feel about the idea of breastfeeding your infant?” and “How do you feel about the idea of formula feeding your infant?” the possible responses were as follows: very uncomfortable, somewhat uncomfortable, somewhat comfortable, or very comfortable.

<sup>h</sup> Ad hoc composite of 3 measures (reported support from family and friends for breastfeeding, convenience of breastfeeding compared with bottle feeding, embarrassment to breastfeeding), assessed at the day 3 interview.

**SUPPLEMENTAL TABLE 5** Odds of Stopping Breastfeeding Before 60 Days by Report of Select Breastfeeding Concern Subcategories at Days 3, 7, 14, and 30

| Main Category                          | Subcategory                                                            | Day 3                      |                                                                                 |                                     | Day 7                      |                                                                                 |                                     | Day 14                     |                                                                                 |                                     | Day 30                     |                                                                                 |                                     |
|----------------------------------------|------------------------------------------------------------------------|----------------------------|---------------------------------------------------------------------------------|-------------------------------------|----------------------------|---------------------------------------------------------------------------------|-------------------------------------|----------------------------|---------------------------------------------------------------------------------|-------------------------------------|----------------------------|---------------------------------------------------------------------------------|-------------------------------------|
|                                        |                                                                        | Report of Concern, No. (%) | Stopping Breastfeeding (% in Mothers With Versus Without Concern, With/Without) | Adjusted OR (95% CI) <sup>a,b</sup> | Report of concern, No. (%) | Stopping Breastfeeding (% in Mothers With Versus Without Concern, With/Without) | Adjusted OR (95% CI) <sup>a,b</sup> | Report of concern, No. (%) | Stopping Breastfeeding (% in Mothers With Versus Without Concern, With/Without) | Adjusted OR (95% CI) <sup>a,b</sup> | Report of concern, No. (%) | Stopping Breastfeeding (% in Mothers With Versus Without Concern, With/Without) | Adjusted OR (95% CI) <sup>a,b</sup> |
| Infant feeding difficulty              | Problems with latch                                                    | 160 (40)                   | 29.4/15.7                                                                       | 2.2 (1.4–3.6)                       | 123 (31)                   | 30.9/14.9                                                                       | 2.9 (1.7–5.0)                       | 72 (19)                    | 30.6/13.0                                                                       | 3.3 (1.7–6.2)                       | 54 (14)                    | 24.1/13.8                                                                       | 2.3 (1.1–4.8)                       |
|                                        | Infant too sleepy to feed                                              | 37 (9)                     | 10.8/22.2                                                                       | 0.5 (0.2–1.5)                       | 22 (6)                     | 9.1/20.5                                                                        | 0.4 (0.1–2.0)                       | 18 (5)                     | 5.6/16.9                                                                        | 0.4 (0.1–3.0)                       | 7 (2)                      | 0/15.6                                                                          | NA                                  |
|                                        | Nipple confusion/refusal to breastfeed                                 | 26 (6)                     | 46.2/19.4                                                                       | 3.3 (1.4–7.9)                       | 24 (6)                     | 41.7/18.5                                                                       | 4.4 (1.8–11.2)                      | 18 (5)                     | 22.2/16.1                                                                       | 1.7 (0.5–5.7)                       | 8 (2)                      | 12.5/15.3                                                                       | 0.8 (0.1–7.3)                       |
|                                        | Frequency/length of feedings                                           | 14 (3)                     | 14.3/21.4                                                                       | 0.6 (0.1–2.7)                       | 27 (7)                     | 7.4/20.8                                                                        | 0.3 (0.1–1.5)                       | 27 (7)                     | 3.7/17.3                                                                        | 0.2 (0.03–1.9)                      | 27 (7)                     | 3.7/16.2                                                                        | 0.3 (0.04–2.3)                      |
|                                        | Fussy/frustrated at breast                                             | 7 (2)                      | 71.4/20.3                                                                       | 18.4 (3.4–101)                      | 7 (2)                      | 57.1/19.2                                                                       | 8.8 (1.7–44.8)                      | 9 (2)                      | 22.2/16.2                                                                       | 1.3 (0.2–7.3)                       | 13 (3)                     | 7.7/15.6                                                                        | 0.5 (0.1–4.4)                       |
|                                        | Infant not feeding well                                                | 9 (2)                      | 11.1/21.4                                                                       | 0.5 (0.1–4.1)                       | 8 (2)                      | 25/19.8                                                                         | 1.8 (0.3–10.0)                      | 11 (3)                     | 9.1/16.6                                                                        | 0.7 (0.1–5.6)                       | 5 (1)                      | 20/15.2                                                                         | 2.6 (0.3–25.5)                      |
| Milk quantity concern                  | Infant not getting enough milk                                         | 94 (23)                    | 27.7/19.2                                                                       | 1.9 (1.1–3.3)                       | 62 (16)                    | 29/18.2                                                                         | 2.6 (1.3–5.0)                       | 38 (10)                    | 23.7/15.5                                                                       | 2.8 (1.2–6.7)                       | 25 (7)                     | 12/15.5                                                                         | 0.8 (0.2–3.2)                       |
|                                        | Milk not in                                                            | 41 (10)                    | 26.8/20.5                                                                       | 1.8 (0.8–3.9)                       | 26 (7)                     | 26.9/19.4                                                                       | 2.0 (0.8–5.2)                       | 5 (1)                      | 17.2/16.2                                                                       | 1.4 (0.6–3.2)                       | 1 (0)                      | 0/15.3                                                                          | NA                                  |
|                                        | Insufficient maternal production                                       | 33 (8)                     | 18.2/21.4                                                                       | 0.8 (0.3–2.5)                       | 21 (5)                     | 23.8/19.7                                                                       | 1.3 (0.4–4.0)                       | 23 (6)                     | 39.1/14.9                                                                       | 4.8 (1.5–8.9)                       | 43 (12)                    | 37.2/12.4                                                                       | 5.7 (2.6–12.3)                      |
|                                        | Infant shows signs of hunger                                           | 12 (3)                     | 25/21                                                                           | 1.0 (0.2–4.3)                       | 12 (3)                     | 41.7/19.2                                                                       | 2.4 (0.7–8.5)                       | 12 (3)                     | 16.7/16.3                                                                       | 0.8 (0.2–4.2)                       | 12 (3)                     | 16.7/15.2                                                                       | 1.2 (0.2–6.0)                       |
| Uncertainty with breastfeeding ability | Breastfeeding technique, positioning, or getting used to breastfeeding | 47 (12)                    | 12.8/22.3                                                                       | 0.7 (0.3–1.7)                       | 26 (7)                     | 11.5/20.5                                                                       | 0.6 (0.2–2.2)                       | 10 (3)                     | 0/16.7                                                                          | NA                                  | 3 (1)                      | 0/15.4                                                                          | NA                                  |
|                                        | Breast anatomy adequacy                                                | 30 (7)                     | 36.7/19.9                                                                       | 3.0 (1.3–7.1)                       | 26 (7)                     | 38.5/18.6                                                                       | 3.6 (1.5–8.9)                       | 15 (4)                     | 33.3/15.7                                                                       | 3.6 (1.1–12.0)                      | 7 (2)                      | 42.9/14.8                                                                       | 5.3 (1.1–26.3)                      |

| Main Category            | Subcategory                                                        | Day 3                      |                                                                                 |                                     | Day 7                      |                                                                                 |                                     | Day 14                     |                                                                                 |                                     | Day 30                     |                                                                                 |                                     |
|--------------------------|--------------------------------------------------------------------|----------------------------|---------------------------------------------------------------------------------|-------------------------------------|----------------------------|---------------------------------------------------------------------------------|-------------------------------------|----------------------------|---------------------------------------------------------------------------------|-------------------------------------|----------------------------|---------------------------------------------------------------------------------|-------------------------------------|
|                          |                                                                    | Report of Concern, No. (%) | Stopping Breastfeeding (% in Mothers With Versus Without Concern, With/Without) | Adjusted OR (95% CI) <sup>a,b</sup> | Report of concern, No. (%) | Stopping Breastfeeding (% in Mothers With Versus Without Concern, With/Without) | Adjusted OR (95% CI) <sup>a,b</sup> | Report of concern, No. (%) | Stopping Breastfeeding (% in Mothers With Versus Without Concern, With/Without) | Adjusted OR (95% CI) <sup>a,b</sup> | Report of concern, No. (%) | Stopping Breastfeeding (% in Mothers With Versus Without Concern, With/Without) | Adjusted OR (95% CI) <sup>a,b</sup> |
|                          | Not sure how long breastfeeding duration/frequency should be       | 8 (2)                      | 25/21.1                                                                         | 1.0 (0.2–5.8)                       | 3 (1)                      | 66.7/19.5                                                                       | 3.1 (0.5–83.0)                      | 0                          | NA                                                                              | NA                                  | 3 (1)                      | 33.3/15.1                                                                       | 6.1 (0.5–71)                        |
|                          | Breastfeeding too difficult or time-consuming                      | 15 (4)                     | 13.3/21.4                                                                       | 170.8 (0.2–3.8)                     | 14 (4)                     | 21.4/19.8                                                                       | 1.2 (0.3–4.6)                       | 9 (2)                      | 11.1/16.5                                                                       | 0.98 (0.1–8.4)                      | 8 (2)                      | 25/15.1                                                                         | 3.1 (0.6–17.1)                      |
|                          | Tired or exhausted                                                 | 8 (2)                      | 12.5/21.3                                                                       | 0.5 (0.1–4.6)                       | 13 (3)                     | 15.4/20.1                                                                       | 0.9 (0.2–4.2)                       | 12 (3)                     | 16.7/16.3                                                                       | 1.4 (0.3–7.1)                       | 10 (3)                     | 0/15.7                                                                          | NA                                  |
|                          | Milk quality or nutritional adequacy of exclusive breast milk diet | 7 (2)                      | 28.6/21                                                                         | 1.4 (0.2–8.1)                       | 7 (2)                      | 42.9/19.5                                                                       | 2.2 (0.4–12.0)                      | 6 (2)                      | 16.7/16.4                                                                       | 0.6 (0.1–5.6)                       | 4 (1)                      | 0/15.4                                                                          | NA                                  |
|                          | Not meeting breastfeeding goals                                    | 4 (1)                      | 0/21.4                                                                          | NA                                  | 6 (2)                      | 33.3/19.7                                                                       | 1.8 (0.3–12.1)                      | 7 (2)                      | 14.3/16.4                                                                       | 1.0 (0.1–8.9)                       | 12 (3)                     | 50.0/14.1                                                                       | 6.2 (1.7–22.6)                      |
|                          | Wanting someone else to feed the infant                            | 3 (1)                      | 0/21.3                                                                          | NA                                  | 2 (1)                      | 0/20.0                                                                          | NA                                  | 2 (1)                      | 0/16.4                                                                          | NA                                  | 1 (0)                      | 0/15.3                                                                          | NA                                  |
|                          | Uncomfortable with the act or connotations of breastfeeding        | 3 (1)                      | 33.4/21.1                                                                       | 0.7 (0.1–8.9)                       | 3 (1)                      | 0/20.1                                                                          | NA                                  | 2 (1)                      | 0/16.4                                                                          | NA                                  | 1 (0)                      | 0/15.3                                                                          | NA                                  |
| Pain while breastfeeding | Painful nipples                                                    | 138 (34)                   | 26.1/18.6                                                                       | 1.4 (0.9–2.4)                       | 152 (39)                   | 26.3/15.8                                                                       | 1.7 (1.02–2.9)                      | 110 (29)                   | 19.1/15.2                                                                       | 1.3 (0.7–2.6)                       | 76 (20)                    | 7.1/14.8                                                                        | 1.3 (0.6–2.6)                       |
|                          | Sore breasts, engorgement, or breast pain                          | 35 (9)                     | 28.6/20.4                                                                       | 1.2 (0.5–2.8)                       | 53 (14)                    | 22.6/19.5                                                                       | 1.2 (0.6–2.5)                       | 42 (11)                    | 19.0/16.0                                                                       | 1.2 (0.5–2.8)                       | 43 (12)                    | 16.3/15.2                                                                       | 1.2 (0.5–3.0)                       |



SUPPLEMENTAL TABLE 5 Continued

| Main Category | Subcategory                                                       | Day 3                      |                                                                                 |                                     | Day 7                      |                                                                                 |                                     | Day 14                     |                                                                                 |                                     | Day 30                     |                                                                                 |                                     |
|---------------|-------------------------------------------------------------------|----------------------------|---------------------------------------------------------------------------------|-------------------------------------|----------------------------|---------------------------------------------------------------------------------|-------------------------------------|----------------------------|---------------------------------------------------------------------------------|-------------------------------------|----------------------------|---------------------------------------------------------------------------------|-------------------------------------|
|               |                                                                   | Report of Concern, No. (%) | Stopping Breastfeeding (% in Mothers With Versus Without Concern, With/Without) | Adjusted OR (95% CI) <sup>a,b</sup> | Report of concern, No. (%) | Stopping Breastfeeding (% in Mothers With Versus Without Concern, With/Without) | Adjusted OR (95% CI) <sup>a,b</sup> | Report of concern, No. (%) | Stopping Breastfeeding (% in Mothers With Versus Without Concern, With/Without) | Adjusted OR (95% CI) <sup>a,b</sup> | Report of concern, No. (%) | Stopping Breastfeeding (% in Mothers With Versus Without Concern, With/Without) | Adjusted OR (95% CI) <sup>a,b</sup> |
|               | Cesarean delivery or other pain not related to breasts or nipples | 13 (3)                     | 23.1/21.1                                                                       | 1.2 (0.3–4.7)                       | 10 (3)                     | 30/19.6                                                                         | 2.0 (0.5–8.7)                       | 6 (2)                      | 33.3/16.1                                                                       | 2.5 (0.4–16.0)                      | 5 (1)                      | 40/14.9                                                                         | 2.8 (0.4–21.0)                      |
|               | Mastitis                                                          | 3 (1)                      | 0/21.3                                                                          | NA                                  | 5 (1)                      | 40/19.6                                                                         | 3.2 (0.5–20.4)                      | 11 (3)                     | 36.4/15.8                                                                       | 3.0 (0.8–11.1)                      | 17 (5)                     | 35.3/14.3                                                                       | 4.0 (1.3–12.0)                      |
|               | Thrush or yeast infection                                         | 0                          | NA                                                                              | NA                                  | 0                          | NA                                                                              | NA                                  | 2 (1)                      | 0                                                                               | NA                                  | 9 (2)                      | 22.2/15.1                                                                       | 1.7 (0.3–9.5)                       |

Analysis restricted to mothers who indicated prenatally their intent to breastfeed >2 mo (N = 402, day 3; N = 392, day 7; N = 379, day 14; N = 373, day 30).

<sup>a</sup> Adjusted for prenatal Infant Feeding Intentions Scale category and maternal education level.

<sup>b</sup> Referent = mothers who did not report the breastfeeding concern subcategory.
